# Supplementary material for: Species-Specific Variations in the Metabolomic Profiles of Acropora hyacinthus and Acropora millepora Mask Acute Temperature Stress Effects in Adult Coral Colonies
Source: Frontiers journal article supplement (doi:10.3389/fmars.2021.574292), 2021-03-25
Supplement: Data_Sheet_1.pdf [file Data_Sheet_1.pdf]

## Supplementary Material

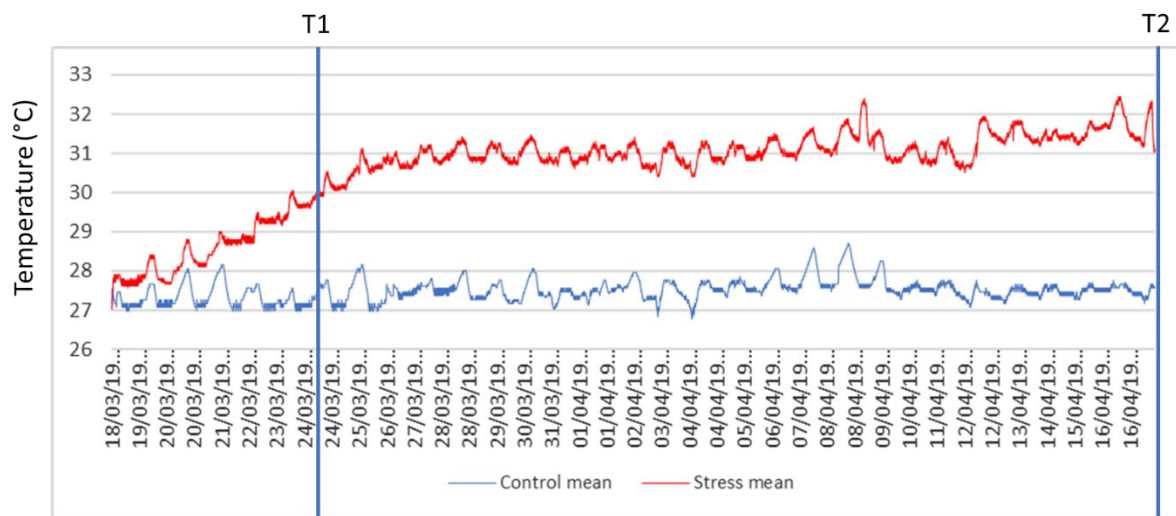

SM Fig 1. Temperatures within control and temperature stress treatments over the 29 day *ex situ* experiment. T1 = time point 1 when the samples were taken for metabolomics. T2 = time point 2 when observations of the end fate of the coral fragments were made – see Figure 6 in the main document.

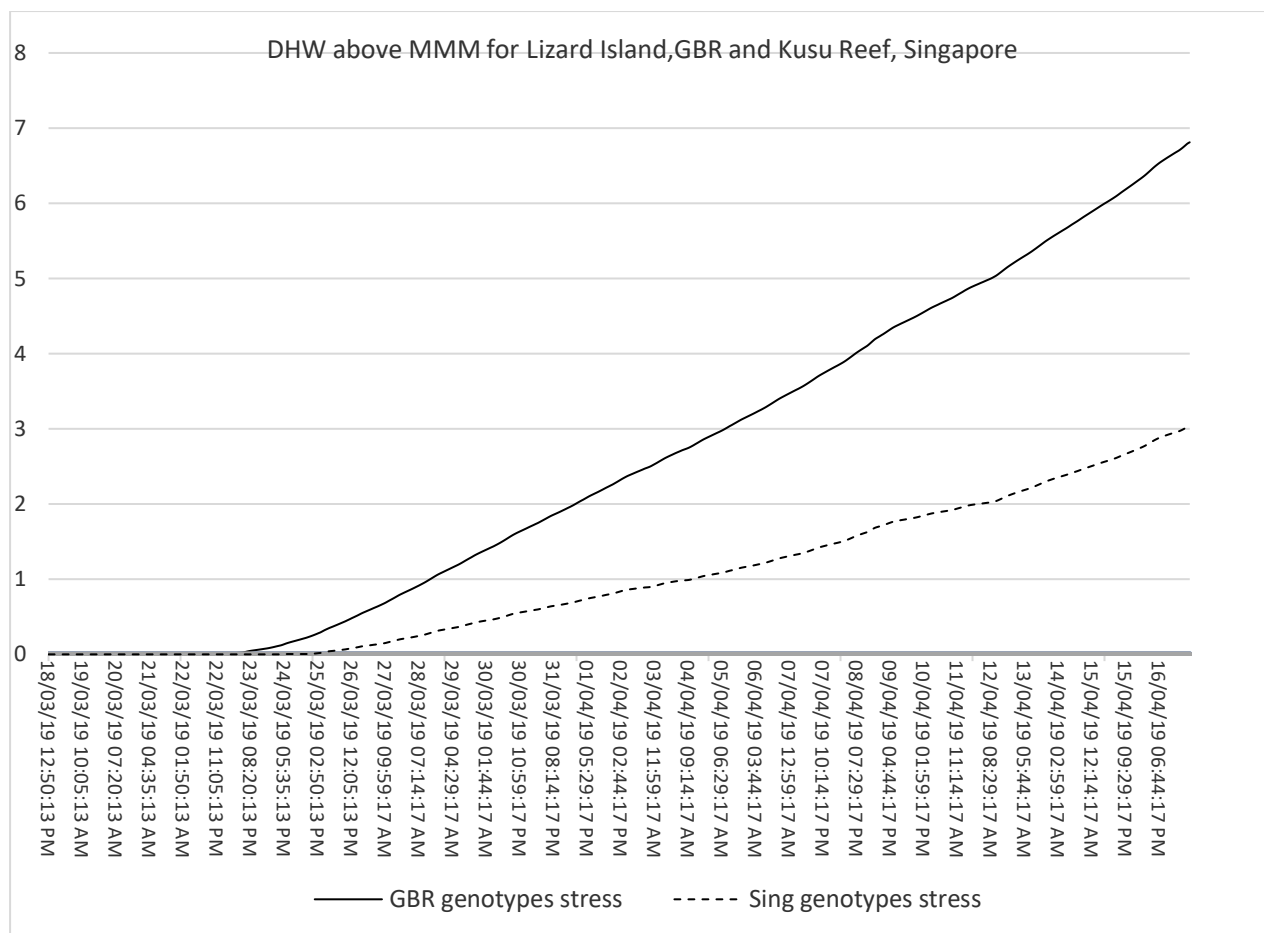

SM Fig 2. Degree heating weeks (DHW) over 29 days calculated from the hottest months from Singapore and Australia, Great Barrier Reef (Singapore = June 30.215 °C and GBR = March 29.142 °C). MMM = maximum monthly mean.

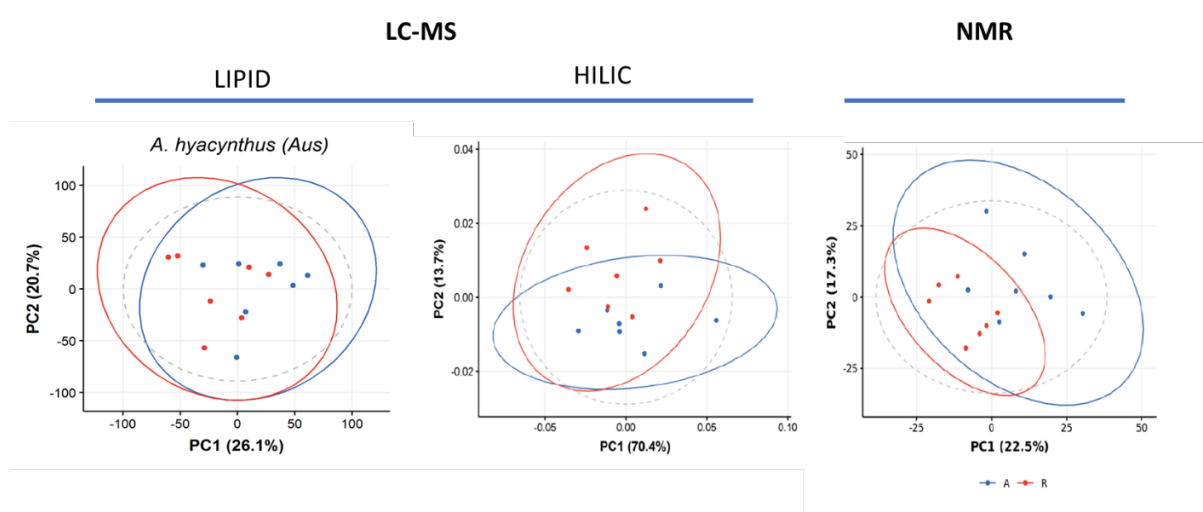

SM Fig 3. Example of the consistent results from the different metabolic profiling methods used during this study. LIPID and HILIC ultra-high-performance liquid chromatography-mass

spectrometry (LC-MS) and nuclear magnetic resonance spectroscopy ( $^1\text{H}$  NMR). Results represented here are for *Acropora hyacinthus*, from one location (Australia) and consist of both the Axial (blue dots – A) and Radial polyps (Red dots – R).

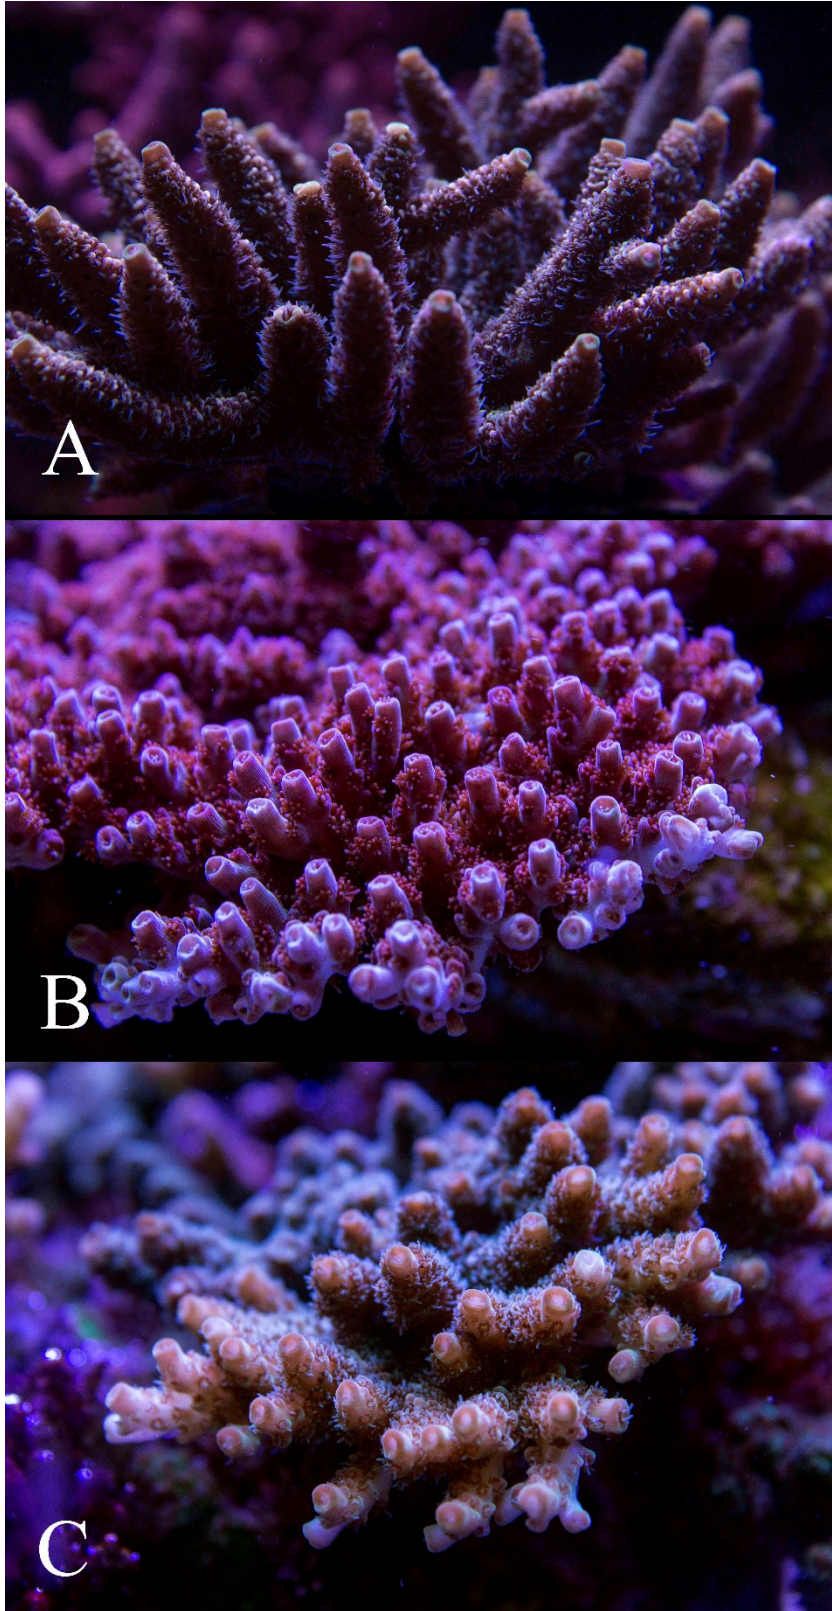



SM Fig 4. Growth structure of *Acropora millepora* and *Acropora hyacinthus* colonies from two geographical locations, GBR and Singapore following over two years of *ex situ* growth. *A. millepora* GBR (A), *A. hyacinthus* GBR (B), and *A. hyacinthus* Singapore (C).

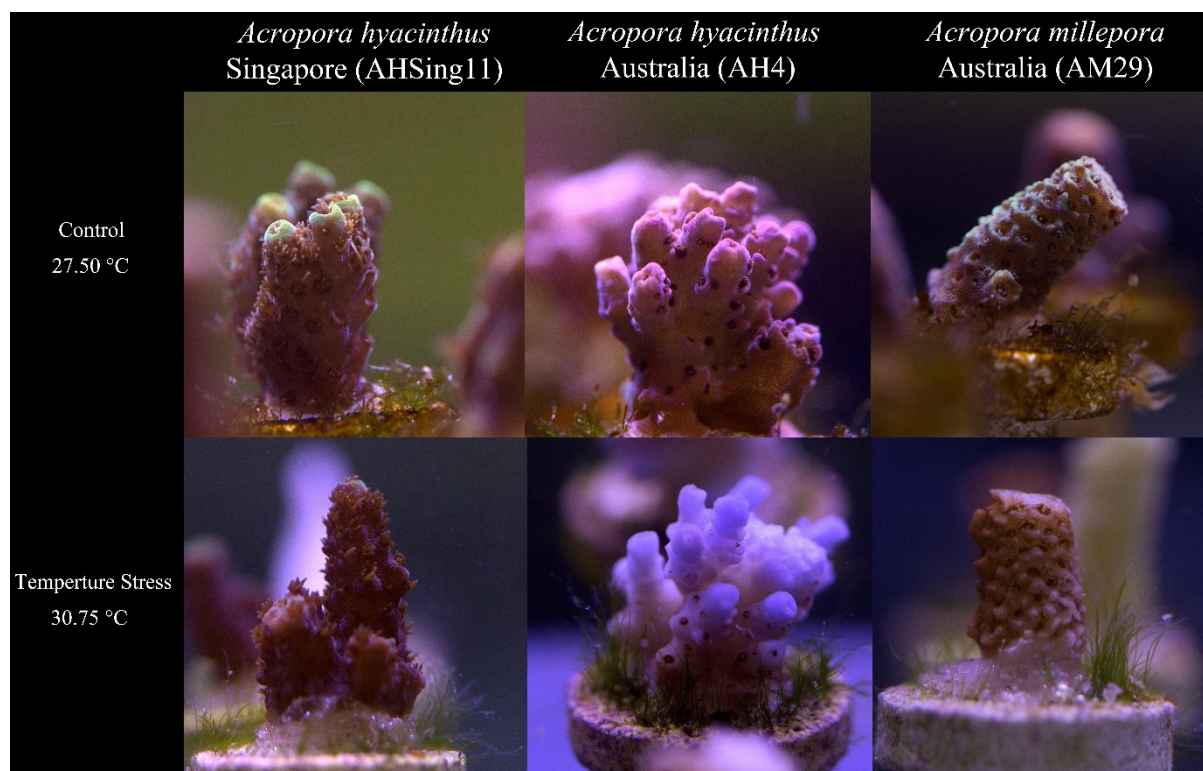

SM Fig 5. Phenotypic variation of *Acropora hyacinthus* (Singapore), *Acropora hyacinthus* (GBR) and *Acropora millepora* (GBR) following 8 days of acute temperature stress.

**Table S1.** IPO optimised XCMS parameters used for peak picking and grouping (if different from default values) for Experiment 1 samples

| Assay                       | min. peak width | max. peak width | ppm | <i>m/z</i> diff | bw   | <i>m/z</i> wid |
|-----------------------------|-----------------|-----------------|-----|-----------------|------|----------------|
| HILIC, negative ionisation  | 4               | 30              | 12  | 0.001           | 0.25 | 0.01           |
| HILIC, positive ionisation  | 4               | 30              | 12  | 0.001           | 0.25 | 0.01           |
| LIPIDS, negative ionisation | 6               | 30              | 14  | 0.001           | 0.25 | 0.01           |

|                                   |   |    |    |       |      |      |
|-----------------------------------|---|----|----|-------|------|------|
| LIPIDS,<br>positive<br>ionisation | 6 | 30 | 14 | 0.001 | 0.25 | 0.01 |
|-----------------------------------|---|----|----|-------|------|------|

**Table S2.** IPO optimised XCMS parameters used for peak picking and grouping (if different from default values) for Experiment 2 samples

| Assay                             | min. peak width | max. peak width | ppm | <i>m/z</i> diff | bw   | <i>m/z</i> wid |
|-----------------------------------|-----------------|-----------------|-----|-----------------|------|----------------|
| HILIC,<br>negative<br>ionisation  | 6               | 41              | 9   | 0.003114        | 0.25 | 0.001          |
| HILIC,<br>positive<br>ionisation  | 6               | 41              | 9   | 0.003114        | 0.25 | 0.001          |
| LIPIDS,<br>negative<br>ionisation | 4               | 32              | 7   | 0.00065         | 0.25 | 0.01325        |
| LIPIDS,<br>positive<br>ionisation | 4               | 32              | 7   | -0.0043         | 0.25 | 0.0157         |
